# Supplementary material for: Functional Anatomy of Split Compound Eyes of the Whirligig Beetles Dineutus mellyi (Coleoptera: Gyrinidae)
Source: MDPI journal article supplement (doi:10.3390/insects15020122), 2024-02-07
Supplement: s1 [file s1]

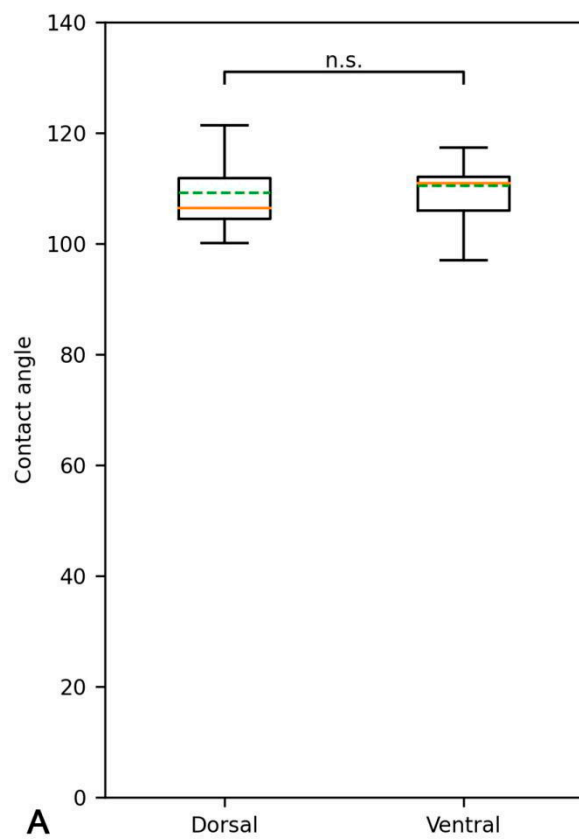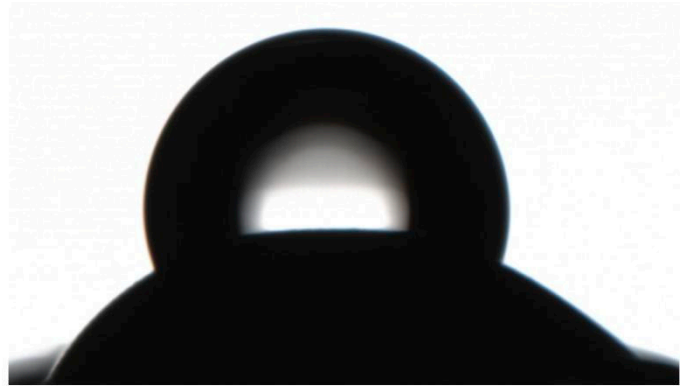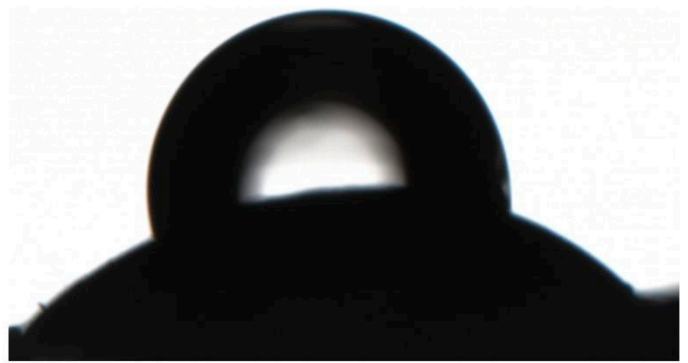

**Figure S1.** (A) The box plot shows a comparison of contact angles between the dorsal and ventral eyes of *D. mellyi*. The difference between the contact angles between regions of the compound eyes was insignificant. (B) Representative photos of water droplets on the surface of dorsal eyes and ventral eyes respectively.
